# Supplementary material for: Surface engineering of SnO2 for improved perovskite/SnO2 photodetectors
Source: Royal Society of Chemistry journal article supplement (doi:10.1039/d5ra10121b), 2026-03-27
Supplement: d5ra10121b1.pdf [file d5ra10121b1.pdf]

## Supporting Materials for

### Surface engineering of SnO<sub>2</sub> for improved perovskite/SnO<sub>2</sub> photodetectors

Jing Cai<sup>1</sup>, Guipeng Li<sup>2</sup>, Yulong Ying<sup>3</sup>, Hongping Li<sup>4,\*</sup>, Ahmad Fairuz Omar<sup>1</sup>, Marzaini Rashid<sup>1,\*</sup>, Mingming Chen<sup>2,\*</sup>

1 School of Physics, Universiti Sains Malaysia, 11800 USM, Penang, Malaysia.

2 Department of Microelectronics, Jiangsu University, Zhenjiang, Jiangsu 212013, China.

3 School of Materials Science and Engineering, Zhejiang Sci-Tech University, Hangzhou, 310018, China.

4 School of Materials Science and Engineering, Jiangsu University, Zhenjiang, Jiangsu 212013, China.

\*Corresponding authors:

hpli@ujs.edu.cn (H. Li), marzaini@usm.my (M. Rashid), andychain@live.cn (M. Chen)

## EXPERIMENTS

**Materials.** MAI (>99.9%), PbI<sub>2</sub> (99.999%), CH<sub>3</sub>COOC<sub>2</sub>H<sub>5</sub> (AR), dimethyl formamide (DMF, anhydrous), dimethyl sulfoxide (DMSO, anhydrous), SnO<sub>2</sub> aqueous solution (3.0 wt%), (NH<sub>4</sub>)<sub>2</sub>WS<sub>4</sub>.

**Surface engineering of SnO<sub>2</sub>.** The surface engineering of SnO<sub>2</sub> was performed as follows: (NH<sub>4</sub>)<sub>2</sub>WS<sub>4</sub> was added to the SnO<sub>2</sub> aqueous solution at concentrations of 1.0, 2.0, and 4.0 mg/mL, and the mixture was stirred at room temperature overnight. During stirring, the surface V<sub>OS</sub> of SnO<sub>2</sub> were passivated through the S substitution.

**Preparation of MAPbI<sub>3</sub>/SnO<sub>2</sub> PDs.** Indium tin oxide (ITO) substrates were cleaned with acetone, ethanol, and DI water. Then, the substrates were dried with N<sub>2</sub> and treated with O<sub>2</sub> plasma for 10 min. After that, SnO<sub>2</sub>/(NH<sub>4</sub>)<sub>2</sub>WS<sub>4</sub> aqueous solution was spin-coated on ITO, followed by annealing at 150 °C to prepare SnO<sub>2</sub> thin films (labeled as S-SnO<sub>2</sub>). Finally, the perovskite precursor, which was prepared by dissolving MAI, PbI<sub>2</sub> and ZIF-67 into DMF/DMSO mixtures, was spin-coated on S-SnO<sub>2</sub>, followed by a two-step annealing process <sup>[1]</sup>. All experiments were carried out in an atmosphere with a humidity of ~ 50%. The scheme of preparation of MAPbI<sub>3</sub>/S-SnO<sub>2</sub> heterojunctions is depicted in Fig. 1a in the main text. Patterned top Au electrodes were deposited using sputtering method with a metal mask. For comparison, MAPbI<sub>3</sub>/SnO<sub>2</sub> heterojunctions were prepared under identical conditions, where the SnO<sub>2</sub> thin films were prepared with a pure SnO<sub>2</sub> aqueous solution (i.e., without surface engineering treatment).

**Characterization.** The morphology of SnO<sub>2</sub> and MAPbI<sub>3</sub> thin films was investigated by scanning electron microscopy (SEM, JSM-7800F). The structure of MAPbI<sub>3</sub> thin films was investigated by X-ray diffraction (XRD, Bruker D8 with Cu K $\alpha$  radiation of 1.54 Å). The steady-state and transient photoluminescence (PL) spectra of MAPbI<sub>3</sub> thin films were characterized with a picoseconds (ps)-pulsed laser at 450 nm. The transient PL data were recorded by a ps time-correlated single photon counting technique. X-ray photoelectron spectroscopy (XPS) was performed to study the atomic electron binding energies of SnO<sub>2</sub> thin films. The performance of MAPbI<sub>3</sub>/SnO<sub>2</sub> heterojunction PDs was characterized by a photoresponse characterization system consisting of a Xenon lamp,

an electronic shutter, an optical attenuator, a monochromator, a microscope, two probes, a Keithley 2401, and a semiconductor parameter analyzer (Keysight, B1500A). The light power of the Xenon lamp was obtained from a standard Si PD.

**Density functional theory calculations.** Density functional theory calculations were carried out within the Vienna ab initio simulation package. The generalized gradient approximation in the form of the Perdew-Burke-Ernzerhof (PBE) exchange-correlation functional (GGA-PBE) was employed. For the case of S doped SnO<sub>2</sub>, SnO (110) surface with dimensions  $9.73 \times 13.58 \text{ \AA}^2$  was constructed with 5 atom layers, in which 2 bottom layers were fixed at the optimized bulk positions. In each slab model, an adequately vacuum space of  $> 15 \text{ \AA}$  to eliminate possible interactions between neighboring slabs. Two types of vacancy configurations were constructed: i.e., (i) O vacancy: removal of a single O atom on the SnO (110) surface; (ii) S substituting for O: S atom occupies the site of the O defect. The k-point mesh for the Brillouin zone was set as  $4 \times 3 \times 1$ . As for the MAPbI<sub>3</sub> system, four types of vacancy configurations were constructed within the  $2 \times 2 \times 2$  supercell: i.e., (i) I vacancy: removal of a single I atom in the stoichiometric host cell; (ii) Pb vacancy: removal of a single Pb atom in the stoichiometric host cell; (iii) S substituting for I: a S atom occupies one I site in the stoichiometric host cell; (iv) S substituting for I with a Pb vacancy nearby: a S atom occupies one I site with a nearest Pb vacancy in the stoichiometric host cell. The structure was fully relaxed when the energy of electron self-consistent iteration was less than  $1.0 \times 10^{-5} \text{ eV/atom}$  and the interatomic forces were less than  $0.02 \text{ eV/\AA}$ .

## Reference

1. Lee, J. H.; Shin, D.; Rhee, R.; Yun, S.; Yeom, K. M.; Chun, D. H.; Lee, S.; Kim, D.; Yi, Y.; Noh, J. H.; Park, J. H., Band Alignment Engineering between Planar SnO<sub>2</sub> and Halide Perovskites via Two-Step Annealing. *J. Phys. Chem. Lett.* **2019**, *10* (21), 6545-6550.

## Supporting Figures

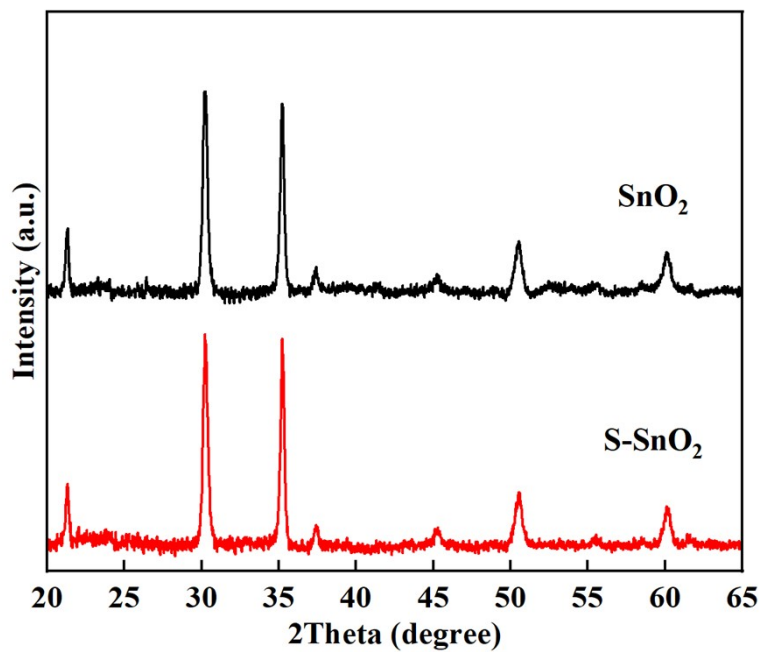

Fig. S1. XRD patterns of SnO<sub>2</sub> and S-SnO<sub>2</sub> thin films.

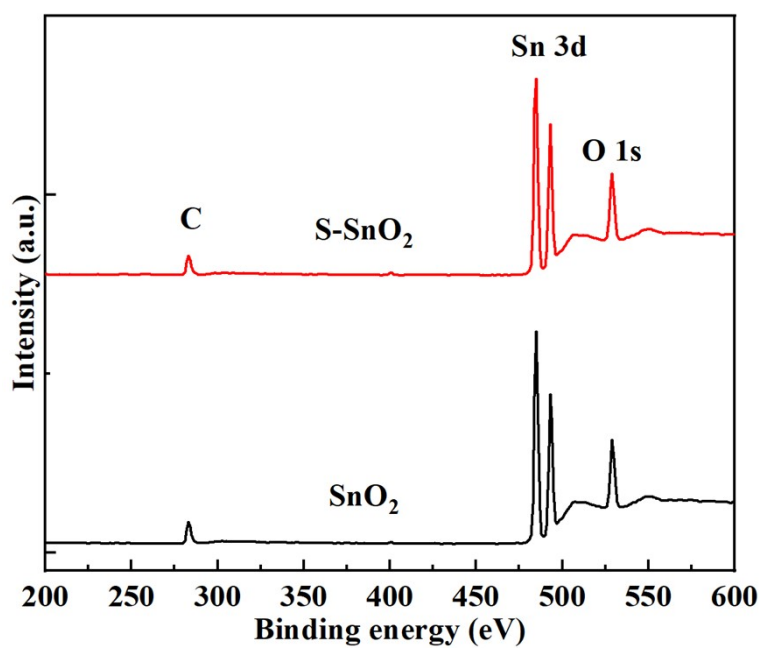

Fig. S2. XPS spectra of SnO<sub>2</sub> and S-SnO<sub>2</sub> thin films.

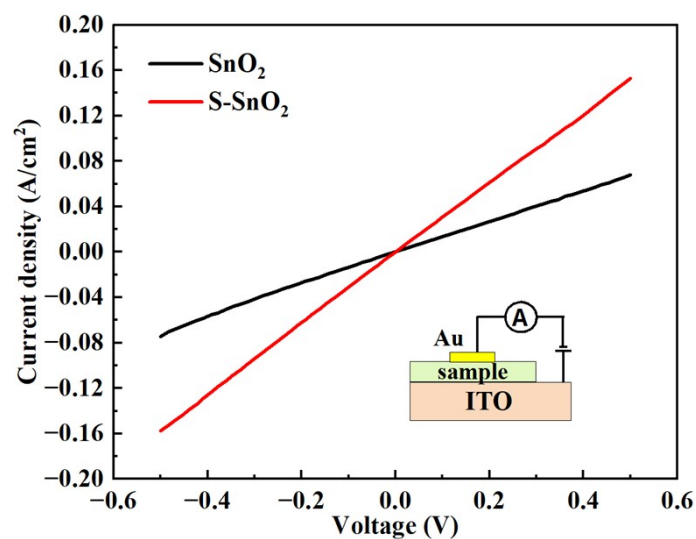

Fig. S3. I-V curves of Au/SnO<sub>2</sub>/ITO and Au/S-SnO<sub>2</sub>/ITO structures.

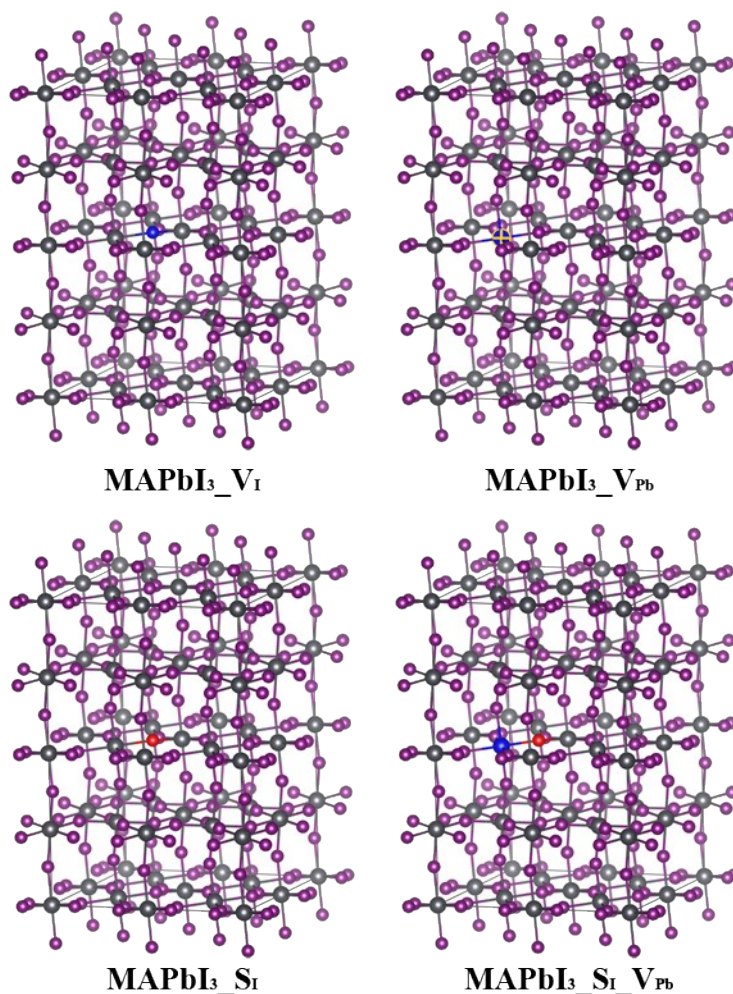

Fig. S4. Structures of MAPbI<sub>3</sub> supercells containing various defects. The vacancy and S substituting are labeled as blue and red spheres, respectively. The CH<sub>3</sub>NH<sub>3</sub> groups are not shown herein.

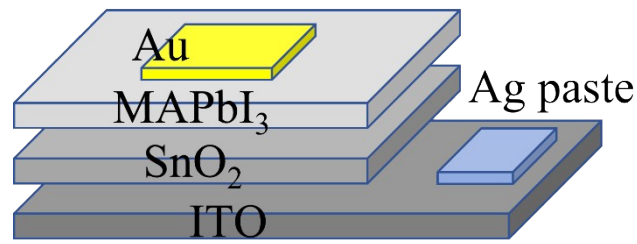

**Fig. S5.** Scheme of MAPbI<sub>3</sub>/SnO<sub>2</sub> heterojunction PDs.

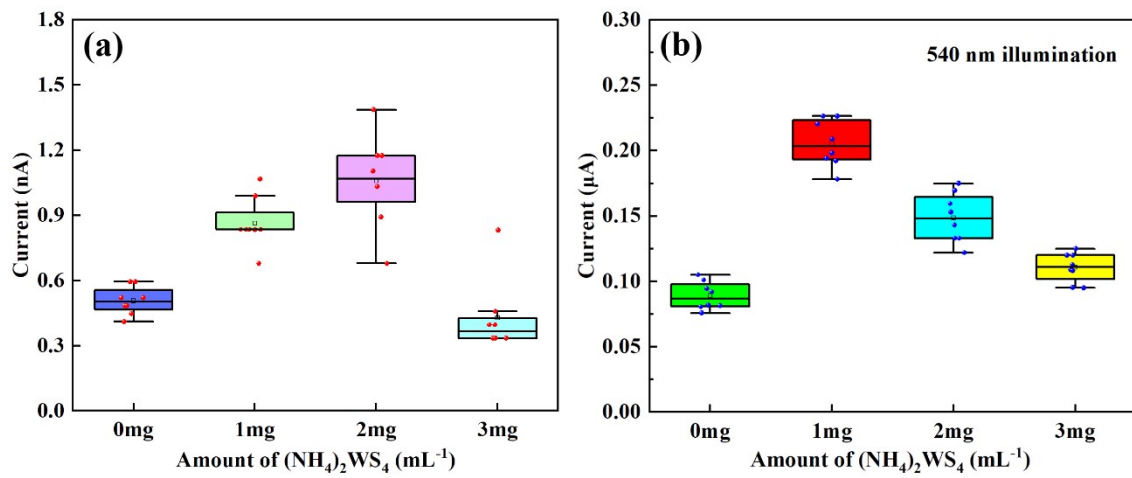

**Fig. S6.** Statistical results of dark current and photocurrent of MAPbI<sub>3</sub>/SnO<sub>2</sub> PDs engineered with different concentrations of (NH<sub>4</sub>)<sub>2</sub>WS<sub>4</sub>.

## Supporting Tables

**Table S1.** Comparison of crystalline of MAPbI<sub>3</sub> thin films prepared on SnO<sub>2</sub> and S-SnO<sub>2</sub>.

| Crystalline plane | XRD peaks position (°) |                       | FWHM (°)            |                       |
|-------------------|------------------------|-----------------------|---------------------|-----------------------|
|                   | On SnO <sub>2</sub>    | On S-SnO <sub>2</sub> | On SnO <sub>2</sub> | On S-SnO <sub>2</sub> |
| <b>020</b>        | 14.16                  | 14.16                 | 0.0938              | 0.1223                |
| <b>002</b>        | 20.06                  | 20.06                 | 0.1132              | 0.1156                |
| <b>031</b>        | 23.54                  | 23.54                 | 0.1213              | 0.1423                |
| <b>220</b>        | 24.56                  | 24.54                 | 0.1269              | 0.1484                |
| <b>040</b>        | 28.50                  | 28.48                 | 0.1274              | 0.1503                |
| <b>230</b>        | 30.26                  | 30.30                 | 0.3679              | 0.3287                |
| <b>141</b>        | 31.94                  | 31.92                 | 0.1432              | 0.1511                |
| <b>321</b>        | 35.26                  | 35.24                 | 0.3810              | 0.3553                |
| <b>400</b>        | 40.72                  | 40.70                 | 0.1835              | 0.1822                |
